# Supplementary material
Source: PubMed Central journal article supplement (PMC5833618)
Supplement: jamasurg-153-60-s001.pdf [file jamasurg-153-60-s001.pdf]

## Supplementary Online Content

Aljehani MA, Morgan JW, Guthrie LA, et al. Association of primary tumor site with mortality in patients receiving bevacizumab and cetuximab for metastatic colorectal cancer. *JAMA Surg*. Published online September 20, 2017.  
doi:10.1001/jamasurg.2017.3466

**eTable 1.** Adjusted Hazard Ratios for Tumor Origin by Treatment Type (n = 11 269)

**eTable 2.** Interaction between Tumor Origin and Selected Treatment Type on Mortality Hazards for Metastatic Colorectal Cancer

This supplementary material has been provided by the authors to give readers additional information about their work.

**eTable 1. Adjusted Hazard Ratios for Tumor Origin by Treatment Type (n = 11 269)<sup>a</sup>**

| <b>Tumor Origin</b> | <b>SC alone</b>  | <b>SC + Bevacizumab</b>              | <b>SC + Cetuximab</b>                |
|---------------------|------------------|--------------------------------------|--------------------------------------|
| Right-Sided         | 1<br>(Reference) | 0.94 (0.89-0.99)<br><i>P</i> = .026  | 1.40 (1.14-1.70)<br><i>P</i> < .0001 |
| Left-Sided          | 1<br>(Reference) | 0.89 (0.86-0.93)<br><i>P</i> < .0001 | 0.83 (0.76-0.96)<br><i>P</i> = .007  |

Abbreviations: SC, systemic chemotherapy; HR, hazard ratio; CI, confidence interval.

<sup>a</sup> Hazard ratios adjusted for age, diagnosis year, mucinous, signet ring, and social economic status using propensity score.

**eTable 2. Interaction Between Tumor Origin and Selected Treatment Type on Mortality Hazards for Metastatic Colorectal Cancer**

| Tumor Origin                                                          | Treatment Types                                        |                                                        | HR (95% CI) for treatment types within strata of tumor origin |
|-----------------------------------------------------------------------|--------------------------------------------------------|--------------------------------------------------------|---------------------------------------------------------------|
|                                                                       | SC+Bevacizumab<br>HR <sup>a</sup> (95% CI)             | SC+Cetuximab<br>HR <sup>a</sup> (95% CI)               |                                                               |
| <b>(A) All subjects treated with BT, 2004-2014 (n=4,383)</b>          |                                                        |                                                        |                                                               |
| Right-sided                                                           | 1.33 (1.28-1.39)<br><i>P</i> <.0001                    | 2.10 (1.84-2.39)<br><i>P</i> <.0001                    | <b>1.56<sup>b</sup> (1.37-1.78)</b><br><i>P</i> <.0001        |
| Left-sided                                                            | 1<br>(Reference)                                       | 0.97 (0.89-1.06)<br><i>P</i> =.51                      | <b>0.97<sup>c</sup> (0.89-1.06)</b><br><i>P</i> =.51          |
| <b>HR (95% CI) for Right vs Left within strata of treatment types</b> |                                                        |                                                        |                                                               |
|                                                                       | <b>1.33<sup>c</sup> (1.28-1.39)</b><br><i>P</i> <.0001 | <b>2.28<sup>d</sup> (1.92-2.70)</b><br><i>P</i> <.0001 |                                                               |
| <b>(B) KRAS wild-type subjects treated with BT, 2010-2014 (n=628)</b> |                                                        |                                                        |                                                               |
| Right-sided                                                           | 1.59 (1.39-1.83)<br><i>P</i> <.0001                    | 2.82 (2.13-3.73)<br><i>P</i> <.0001                    | <b>1.80<sup>b</sup> (1.35-2.42)</b><br><i>P</i> <.0001        |
| Left-sided                                                            | 1<br>(Reference)                                       | 0.75 (0.63-0.90)<br><i>P</i> =.002                     | <b>0.75<sup>c</sup> (0.63-0.90)</b><br><i>P</i> =.002         |
| <b>HR (95% CI) for Right vs Left within strata of treatment types</b> |                                                        |                                                        |                                                               |
|                                                                       | <b>1.59<sup>c</sup> (1.39-1.83)</b><br><i>P</i> <.0001 | <b>3.19<sup>d</sup> (2.30-4.42)</b><br><i>P</i> <.0001 |                                                               |

Abbreviations: SC, systemic chemotherapy; HR, hazard ratio; CI, confidence interval; BT, biologic therapy;

<sup>a</sup> HR adjusted for age, diagnosis year, mucinous, signet ring, and social economic for part status using propensity score (A) and HR adjusted for age, diagnosis year, and social economic for part status using propensity score (B).

<sup>b</sup> Referent category is right-sided treated with SC and bevacizumab.

<sup>c</sup> Referent category is left-sided treated with SC and bevacizumab.

<sup>d</sup> Referent category is left-sided treated with SC and cetuximab.
